# Supplementary material for: A high-performance tin phosphide/carbon composite anode for lithium-ion batteries
Source: Royal Society of Chemistry journal article supplement (doi:10.1039/d0dt03139a), 2020-01-01
Supplement: d0dt03139a1.pdf [file d0dt03139a1.pdf]

## *Supplementary material for:*

### **High-performance Tin Phosphide/Carbon Composite Anode for Lithium-ion Batteries**

Miao Wang<sup>1,2</sup>, Guo-Ming Weng<sup>3</sup>, Ghulam Yasin<sup>1,2</sup>, Mohan Kumar<sup>1,2</sup>, Wei Zhao<sup>1\*</sup>

<sup>1</sup> Institute for Advanced Study, Shenzhen University, Shenzhen 518060, China

<sup>2</sup> College of Physics and Optoelectronic Engineering, Shenzhen University, Shenzhen 518060, China

<sup>3</sup> Department of Chemical and Biomolecular Engineering, New York University, Brooklyn, New York 11201, United States

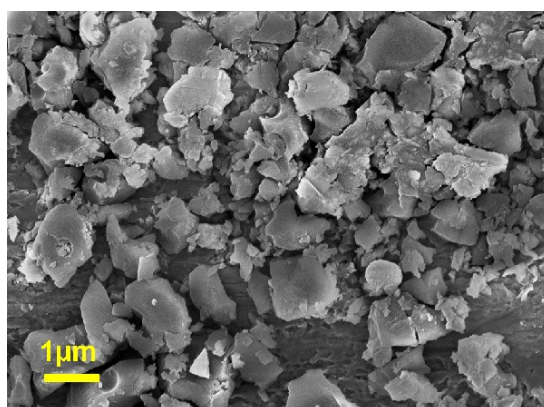

**Fig. S1** Low-magnified SEM image of the SnP/C composite.

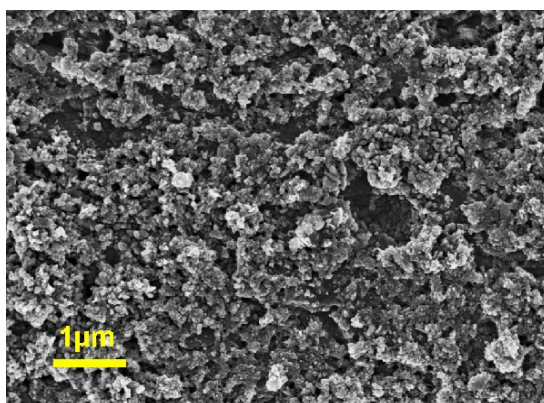

**Fig. S2** Low-magnified SEM image of the Sn<sub>4</sub>P<sub>3</sub>/C composite.

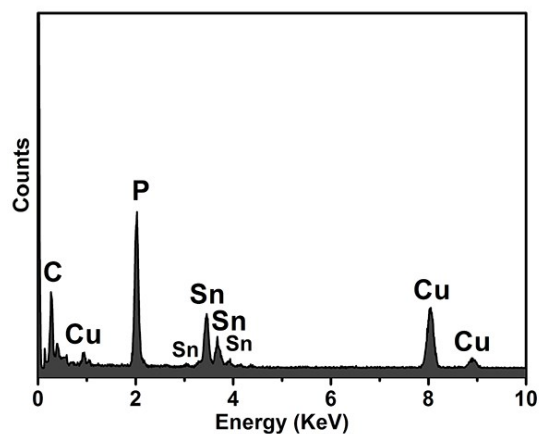

**Fig. S3** The EDX spectra for the SnP/C composite, and the signal of Cu arises from the TEM grid.

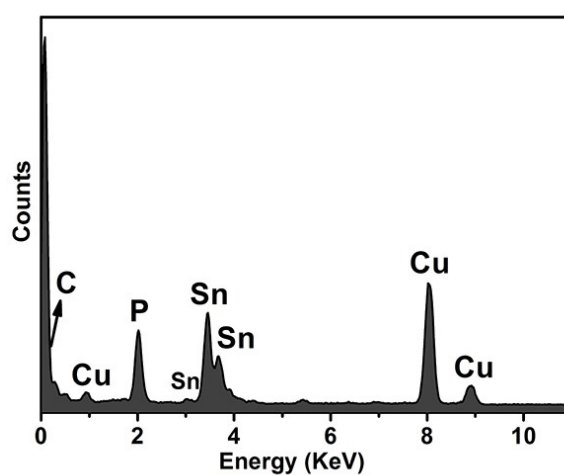

**Fig. S4** The EDX spectra for the Sn<sub>4</sub>P<sub>3</sub>/C composite, and the signal of Cu arises from the TEM grid.

Raman spectrum of the SnP/C composite (**Fig. S5**) shows two characteristic peaks situated around 1337 cm<sup>-1</sup> and 1601 cm<sup>-1</sup>, attributed to the D- and G-bands of graphite, respectively.

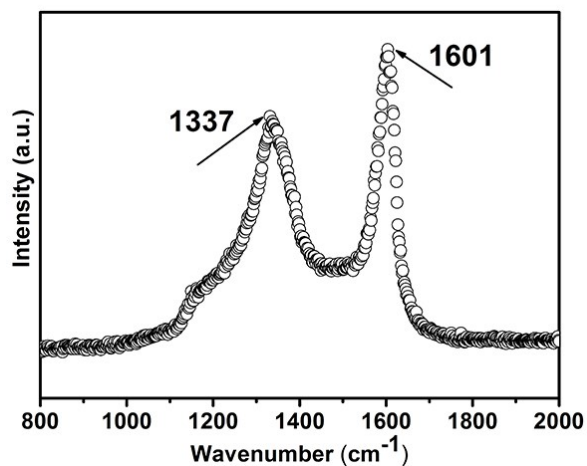

**Fig. S5** Raman spectrum of the SnP/C composite.

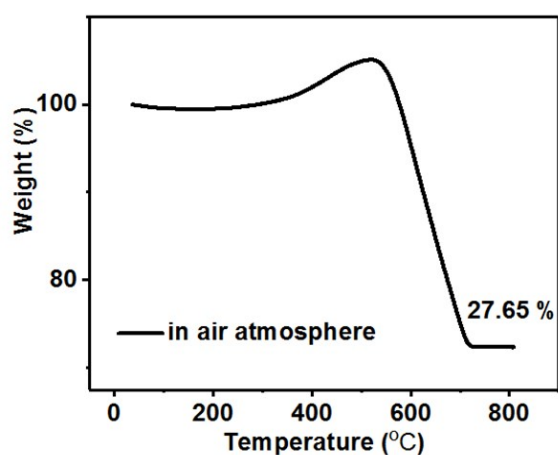

**Fig. S6** TGA curve of the SnP/C composite under air atmosphere.

C 1s spectrum of the SnP/C composite is shown in **Fig. S7**, where the main peak at 284.7 eV is attributed to the graphitic carbon coat of SnP/C and the small peak at ~286.1 eV corresponding to the C-O bond.

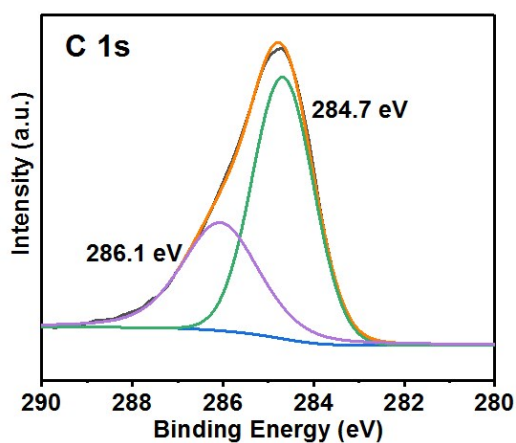

**Fig. S7** X-Ray photoelectron spectral region for C 1s level of the SnP/C composite.

**Fig. S8** shows the C 1s spectrum of the Sn<sub>4</sub>P<sub>3</sub>/C composite, which is very similar to that of SnP/C. And the small peak at ~286 eV can be ascribed to the C-O.

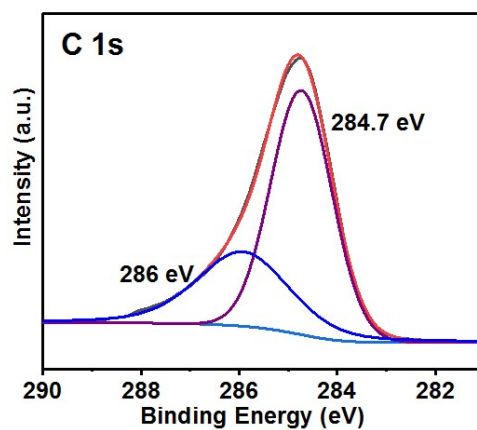

**Fig. S8** X-Ray photoelectron spectral region for C 1s level of the  $\text{Sn}_4\text{P}_3/\text{C}$  composite.

The cyclic performance of the SnP/C at  $0.1 \text{ A g}^{-1}$  is displayed in **Fig. S9**, and the SnP/C electrode remains a specific capacity around  $751 \text{ mAh g}^{-1}$  after 30 cycles.

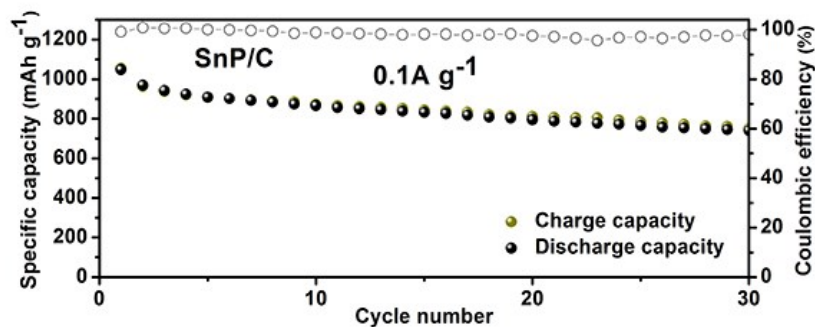

**Fig. S9** Cycling performance and coulombic efficiency (CE) of the SnP/C composite electrode at a current density of  $0.1 \text{ A g}^{-1}$ .

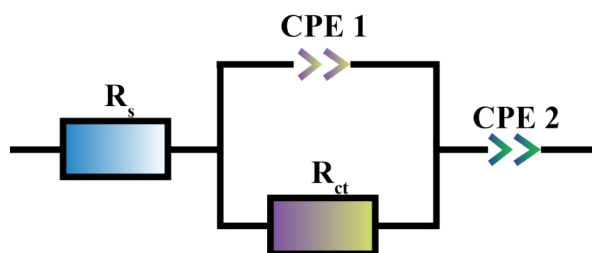

**Fig. S10** The equivalent circuit model to fit the Nyquist plots, and  $R_s$ : Contact resistance between electrode and electrolyte;  $R_{ct}$ : Charge transfer resistance; CPE: Constant phase element.
